# Supplementary material
Source: PubMed Central journal article supplement (PMC7665991)

Figure S1

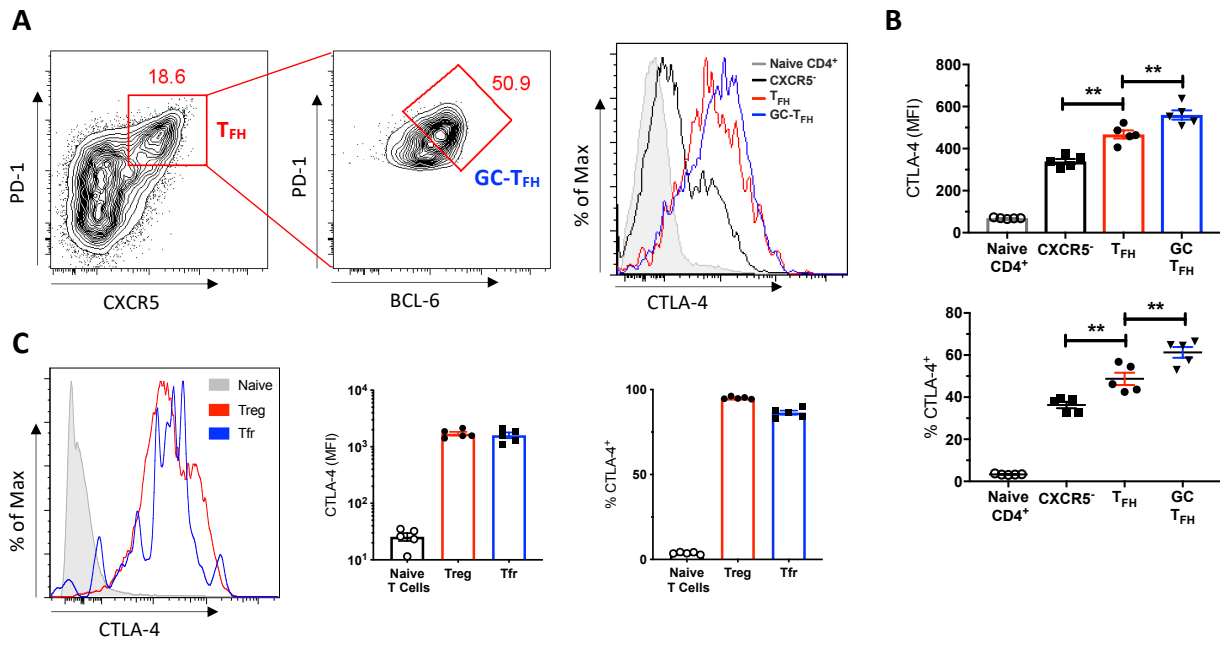

Supplement: NIHMS1601581-supplement-supp_figS1.pdf [file NIHMS1601581-supplement-supp_figS1.pdf]
